# Supplementary material
Source: PubMed Central journal article supplement (PMC8273126)
Supplement: NIHMS1704956-supplement-1.pdf [file NIHMS1704956-supplement-1.pdf]

Figure S1

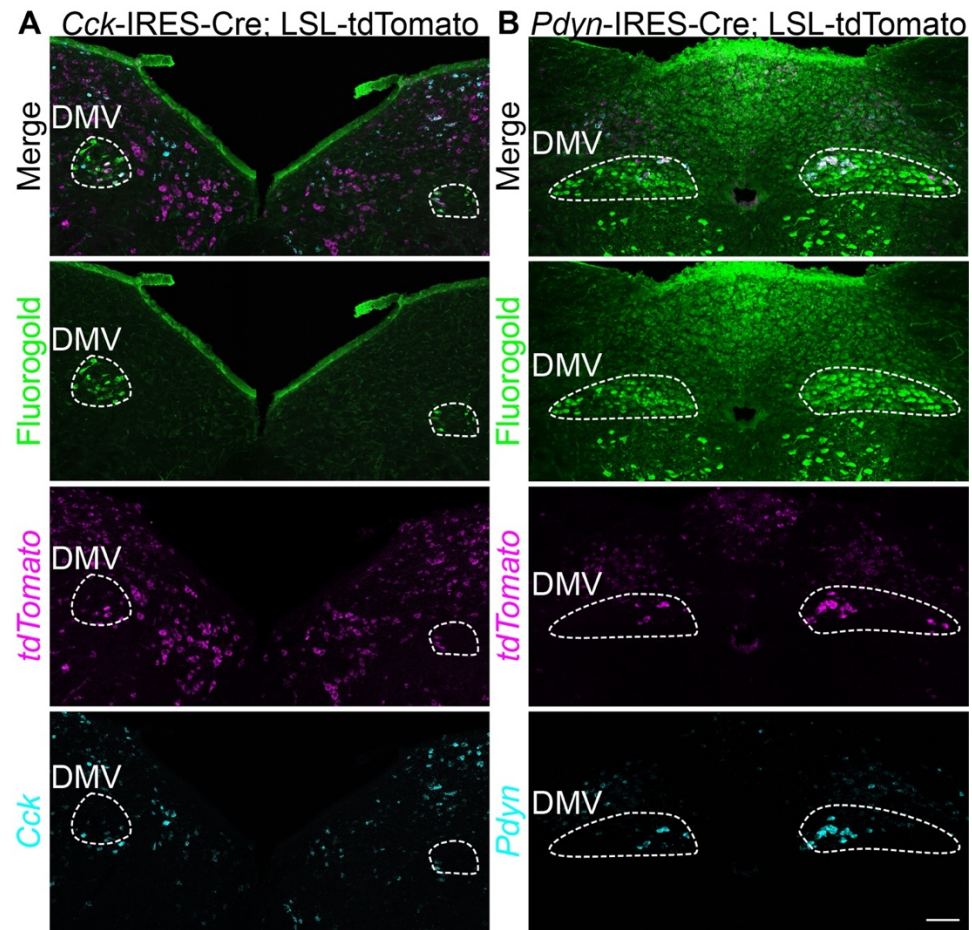

**Figure S1. Validation of *Cck*-IRES-Cre and *Pdyn*-IRES-Cre mice, Related to Figure 3**

(A) *In situ hybridization* of *Cck* and tdTomato expression in the DMV of *Cck*-IRES-Cre; LSL-tdTomato mice (n = 2). 63.1% of *Cck*<sup>+</sup> neurons are tdTomato<sup>+</sup> and 77.9% of tdTomato<sup>+</sup> neurons are *Cck*<sup>+</sup>; scale bar: 200 μm.

(B) *In situ hybridization* of *Pdyn* and tdTomato expression in the DMV of *Pdyn*-IRES-Cre; LSL-tdTomato mice (n = 2). 63.6% of *Pdyn*<sup>+</sup> neurons are tdTomato<sup>+</sup> and 83.4% of tdTomato<sup>+</sup> neurons are *Pdyn*<sup>+</sup>; scale bar: 200 μm.

Figure S2

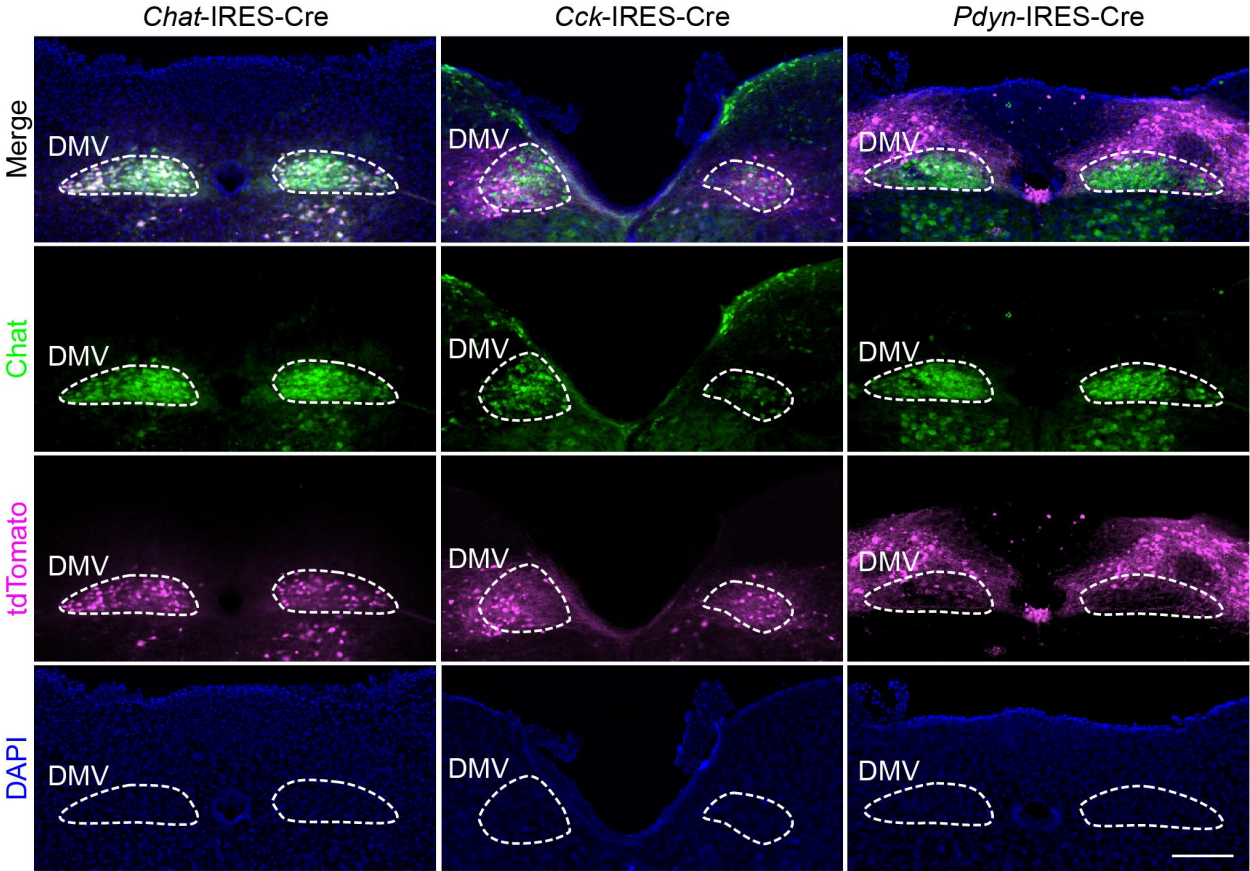

**Figure S2. Genetic Access to *Chat*<sup>+</sup>, *Cck*<sup>+</sup>, and *Pdyn*<sup>+</sup> DMV neurons, Related to Figure 3**  
(A) tdTomato expression in the DMV of *Chat*-IRES-Cre, *Cck*-IRES-Cre, and *Pdyn*-IRES-Cre mice following brainstem injection of AAV-FLEX-tdTomato; scale bar: 200 μm.

**Figure S3**

**A** Simultaneous identification of cholinergic and nitergic enteric neurons in the glandular stomach

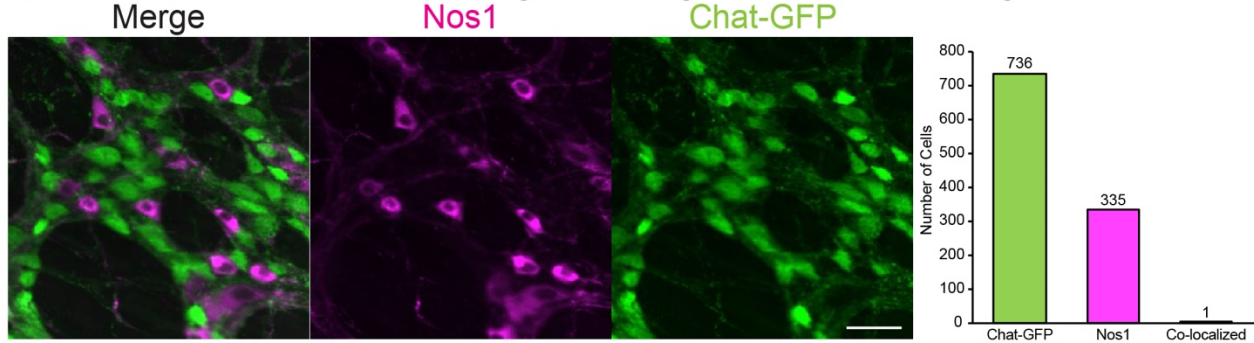

**B** Enteric neurons queried for surrounding DMV pericellular arborization

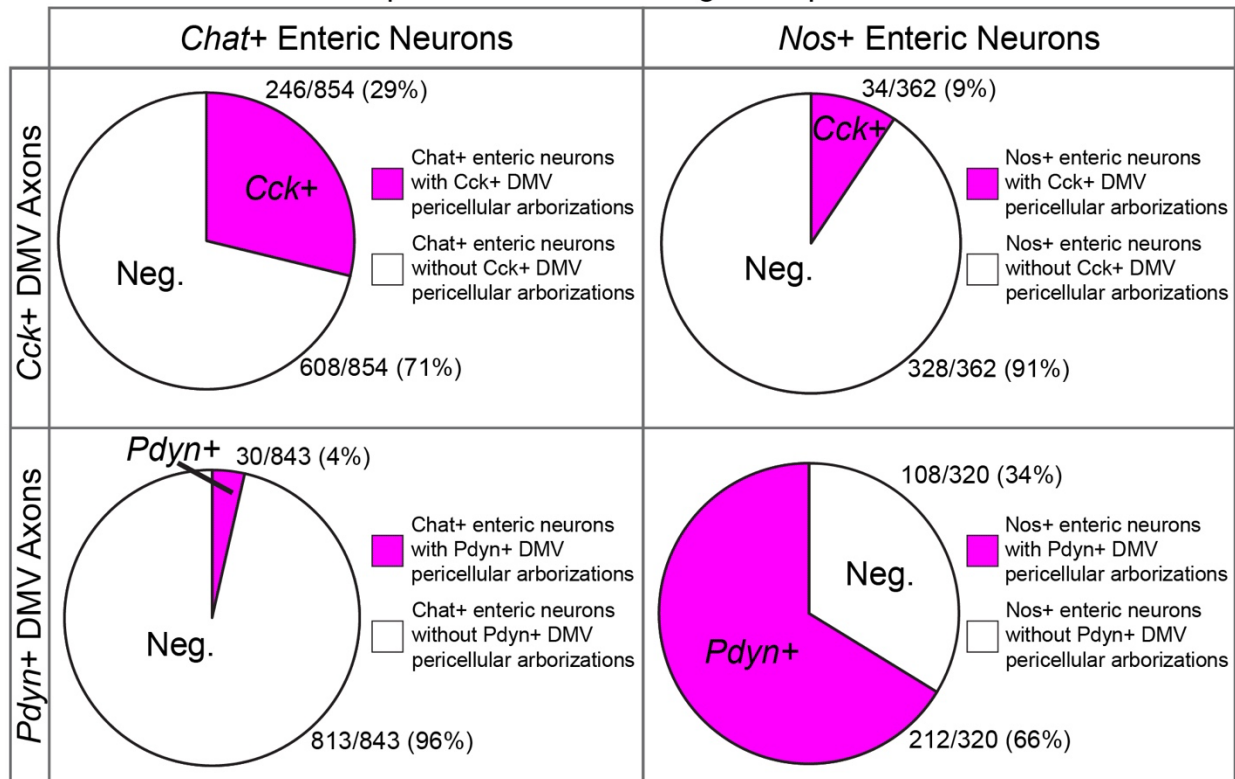

**Figure S3. Enteric Neurons With or Without Surrounding DMV Pericellular Arborization, Related to Figure 4.**

(A) Number of enteric neurons in the glandular stomach marked by Chat-GFP, Nos1, or both (n = 2); scale bar: 50  $\mu$ m.

(B) Numbers of enteric neurons in the glandular stomach with or without DMV pericellular arborizations in *Cck*-IRES-Cre (n = 3), *Cck*-IRES-Cre;*Chat*-GFP (n = 3), *Pdyn*-IRES-Cre (n = 3), and *Pdyn*-IRES-Cre;*Chat*-GFP (n = 3) mice.
